# Supplementary material for: Cyclin D1 extensively reprograms metabolism to support biosynthetic pathways in hepatocytes
Source: PubMed Central journal article supplement (PMC10687208; doi:10.1016/j.jbc.2023.105407), 2023-10-28

# Sup. Fig 2

## A

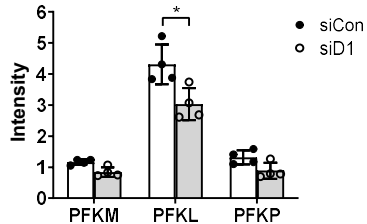

## B

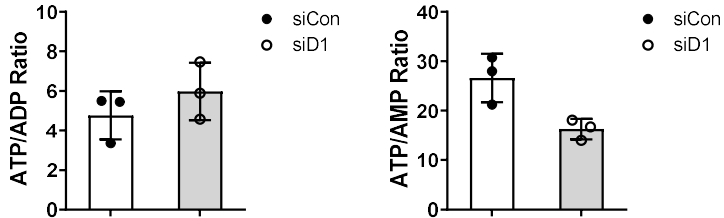

Supplement: mmc3.pdf [file mmc3.pdf]
